# Supplementary material
Source: PubMed Central journal article supplement (PMC1559765)

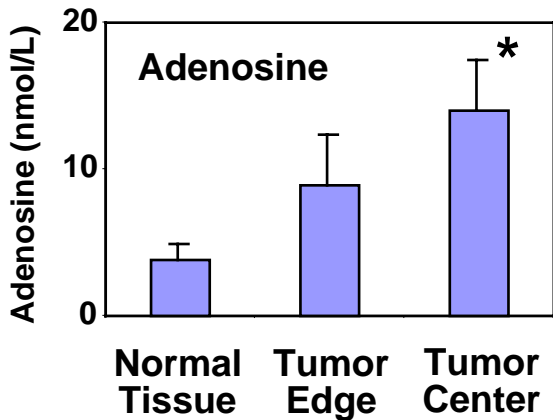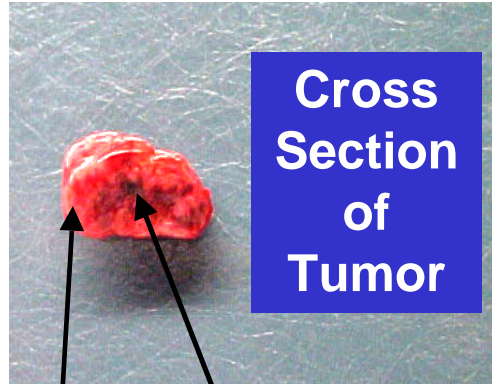

**Edge Center**

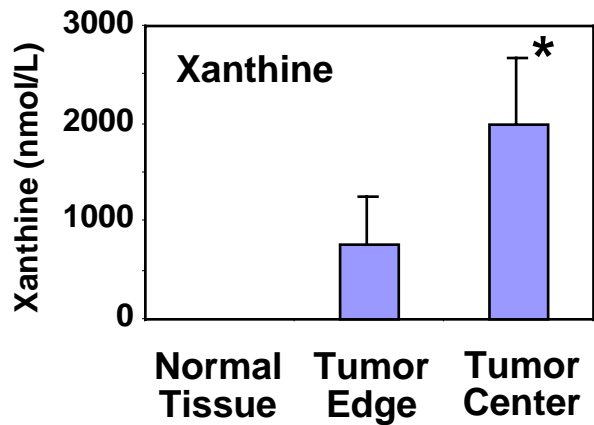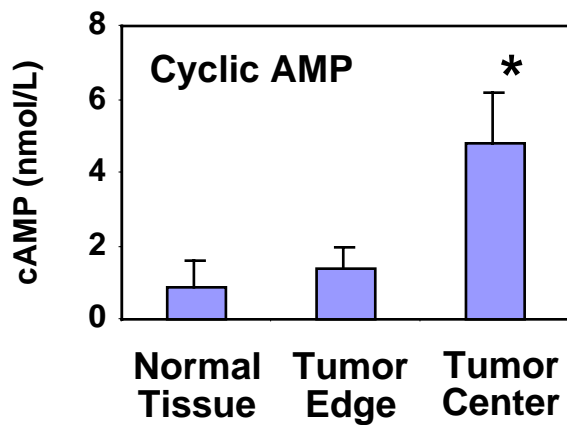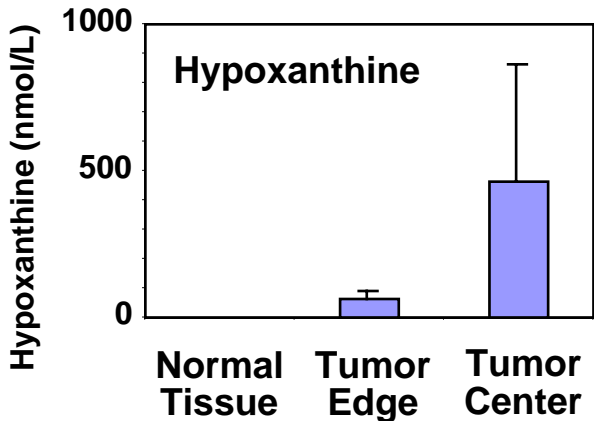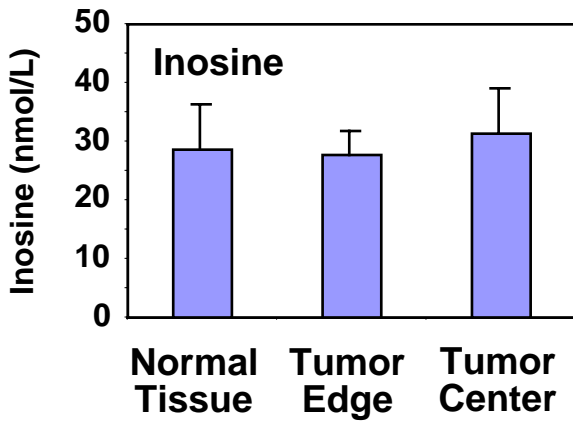

Supplement: pnas_0605251103_1.pdf [file pnas_0605251103_1.pdf]

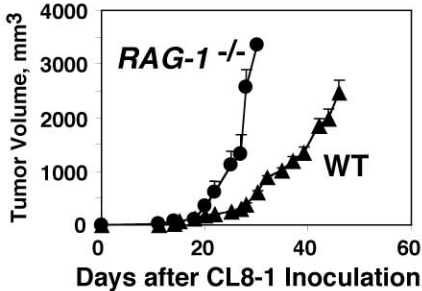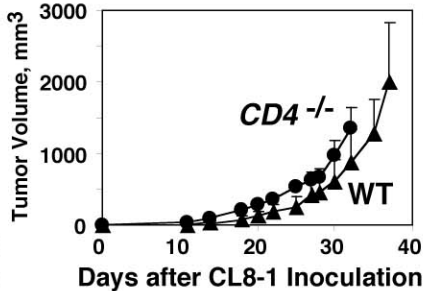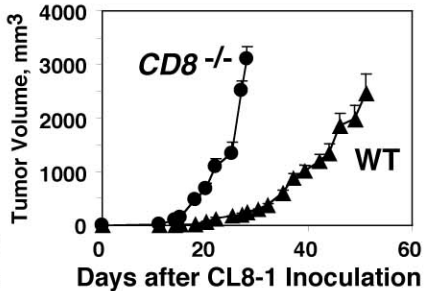

Supplement: pnas_0605251103_2.pdf [file pnas_0605251103_2.pdf]

**a**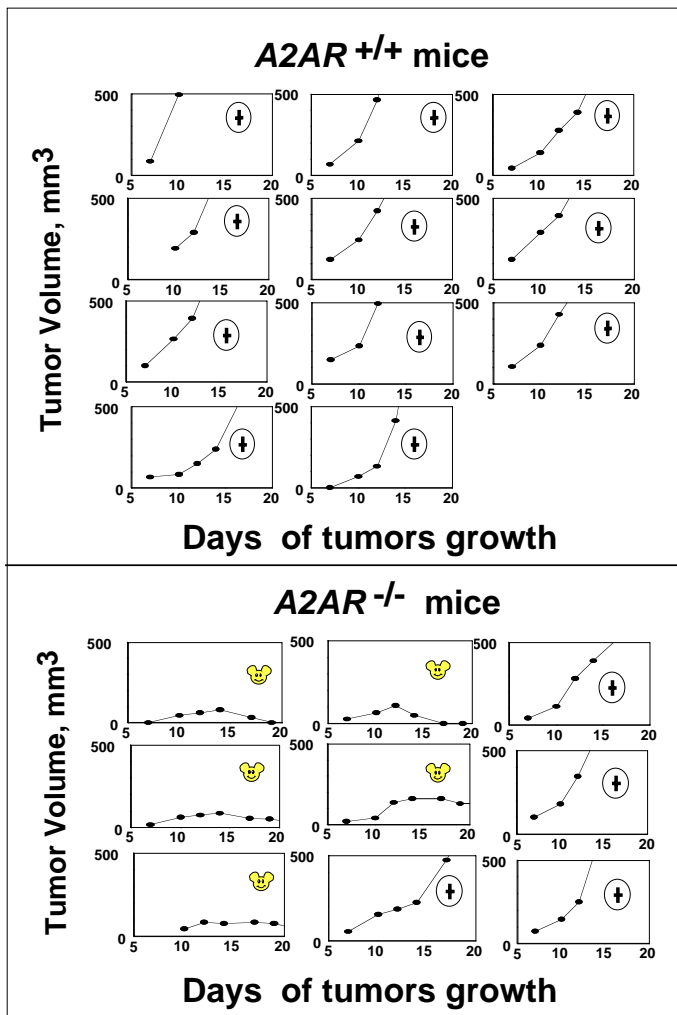**b**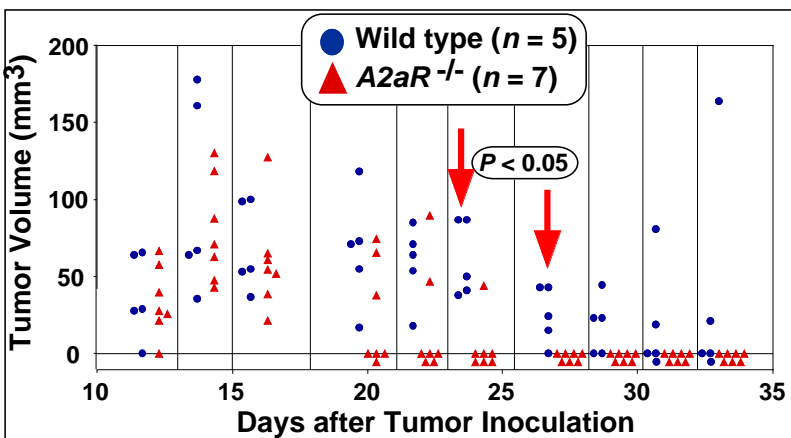

Supplement: pnas_0605251103_3.pdf [file pnas_0605251103_3.pdf]

**a**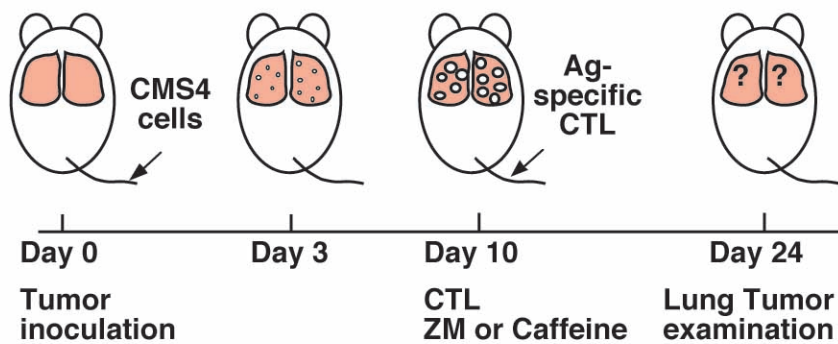**b**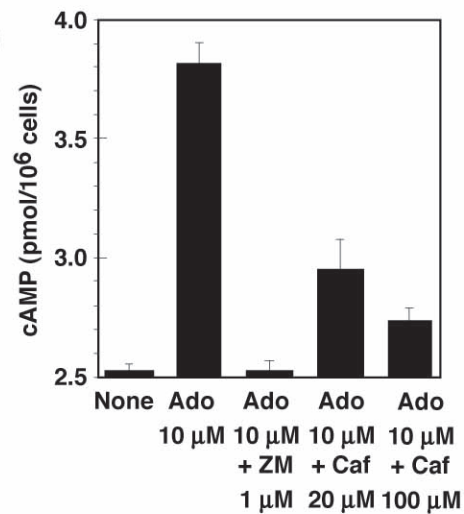**c**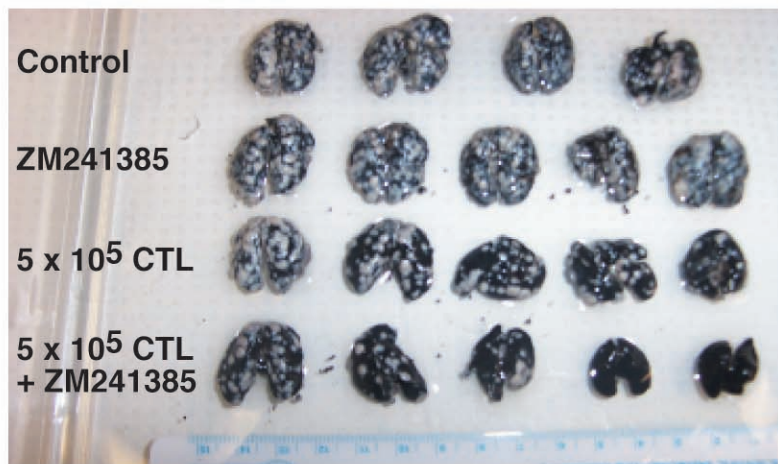**d**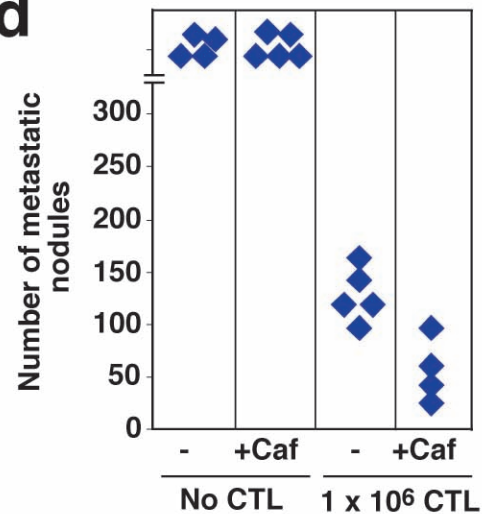**e**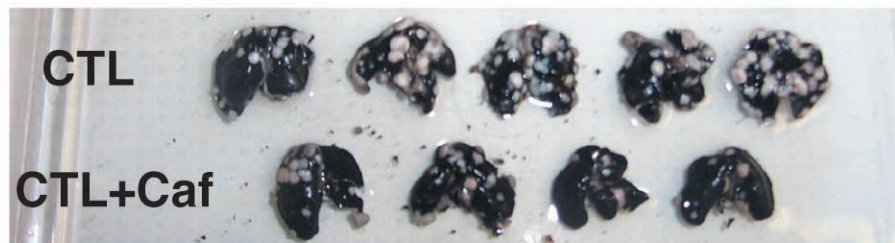

Supplement: pnas_0605251103_4.pdf [file pnas_0605251103_4.pdf]

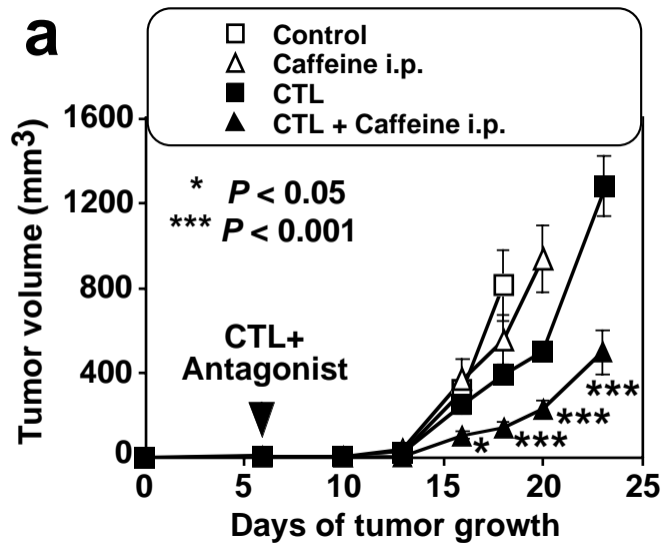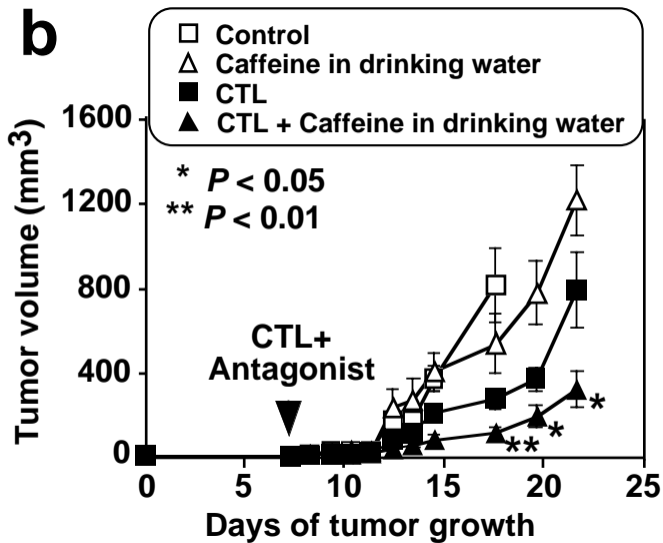

Supplement: pnas_0605251103_5.pdf [file pnas_0605251103_5.pdf]
